# Supplementary material for: Echocardiographic phenotypes of diabetic myocardial disorder: evolution over 15 months follow-up in the ARISE-HF trial
Source: Springer Nature journal article supplement (doi:10.1186/s12933-024-02554-y), 2025-01-13
Supplement: MOESM1 [file 12933_2024_2554_MOESM1_ESM.pdf]

**Appendix Table 1. Comparison of biomarker group and rest of patients in ARISE-HF.**

|                                       | Elevated Biomarker (907)                  | Echo abnormalities (556) | p                       |        |
|---------------------------------------|-------------------------------------------|--------------------------|-------------------------|--------|
| <b>Demographic/clinical variables</b> | Age (mean (SD))                           | 67.25 (7.48)             | 67.33 (7.59)            | 0.85   |
|                                       | Male (%)                                  | 496 (54.7)               | 301 (54.1)              | 0.88   |
|                                       | Race (%)                                  |                          |                         | 0.10   |
|                                       | White                                     | 597 (65.8)               | 328 (59.0)              |        |
|                                       | Hispanic                                  | 179 (19.7)               | 121 (21.8)              |        |
|                                       | Black                                     | 61 (6.7)                 | 55 (9.9)                |        |
|                                       | Asian                                     | 58 (6.4)                 | 41 (7.4)                |        |
|                                       | American Indian or Alaskan Native         | 3 (0.3)                  | 2 (0.4)                 |        |
|                                       | Other                                     | 9 (1.0)                  | 9 (1.6)                 |        |
|                                       | SBP (mean (SD))                           | 130.31 (13.26)           | 129.87 (13.38)          | 0.62   |
| DBP (mean (SD))                       | 76.08 (8.87)                              | 75.90 (8.79)             | 0.76                    |        |
| <b>Laboratory Tests</b>               | NT-proBNP (median [IQR])                  | 77.00 [44.00, 138.00]    | 78.00 [34.00, 142.00]   | 0.68   |
|                                       | hs-cTnt (median [IQR])                    | 9.00 [7.00, 13.00]       | 9.00 [7.00, 14.00]      | 0.79   |
|                                       | HBA1 (mean (SD))                          | 7.22 (1.27)              | 7.11 (0.95)             | 0.07   |
|                                       | Hgb (mean (SD))                           | 13.70 (1.50)             | 13.64 (1.43)            | 0.49   |
|                                       | eGFR (mean (SD))                          | 77.72 (18.38)            | 79.27 (17.50)           | 0.11   |
| <b>Echocardiogram</b>                 | LVEF (median [IQR])                       | 63.00 [60.00, 66.00]     | 61.00 [58.00, 64.00]    | <0.001 |
|                                       | GLS (median [IQR])                        | -18.80 [-20.20, -17.90]  | -15.20 [-17.00, -14.20] | <0.001 |
|                                       | LAVI (median [IQR])                       | 22.00 [18.60, 26.00]     | 25.10 [20.00, 34.10]    | <0.001 |
|                                       | LVMI (median [IQR])                       | 68.00 [60.00, 79.00]     | 83.00 [67.00, 98.00]    | <0.001 |
|                                       | EE (median [IQR])                         | 8.70 [7.38, 10.30]       | 10.30 [8.40, 13.90]     | <0.001 |
|                                       | RVSP (median [IQR])                       | 22.60 [18.80, 26.00]     | 24.05 [19.52, 30.60]    | <0.001 |
| <b>CPET</b>                           | PEAK VO2 (mean (SD))                      | 16.52 (4.91)             | 15.99 (4.77)            | 0.10   |
|                                       | Duration of CPET test, min, mean ± SD     | 9.98 (2.79)              | 9.79 (2.93)             | 0.32   |
|                                       | Peak respiratory exchange rate, mean ± SD | 1.16 (0.10)              | 1.16 (0.11)             | 0.84   |
| <b>Questionnaires</b>                 | KCCQ physical limitation score, mean ± SD |                          |                         |        |
|                                       | KCCQ symptom stability score, mean ± SD   |                          |                         |        |
|                                       | KCCQ symptom burden score, mean ± SD      |                          |                         |        |
|                                       | KCCQ self-efficacy score, mean ± SD       |                          |                         |        |
|                                       | KCCQ quality of life score, mean ± SD     |                          |                         |        |
|                                       | KCCQ social limitation score, mean ± SD   |                          |                         |        |
|                                       | KCCQ total symptom score, mean ± SD       |                          |                         |        |
|                                       | KCCQ clinical summary score, mean ± SD    |                          |                         |        |
|                                       | KCCQ overall summary score, mean ± SD     |                          |                         |        |
|                                       | PASE score, mean ± SD                     |                          |                         |        |

**Appendix Table 2. Comparison of biomarkers group with an NT-proBNP cut-off of 125 ng/L and the rest of the participants.**

|                                               | Elevated Biomarkers     | All                     | p      |
|-----------------------------------------------|-------------------------|-------------------------|--------|
| n                                             | 751                     | 556                     |        |
| AGE (mean (SD))                               | 67.46 (7.49)            | 67.33 (7.59)            | 0.76   |
| MALE (%)                                      | 441 (58.7)              | 301 (54.1)              | 0.11   |
| RACE (%)                                      |                         |                         | 0.08   |
| White                                         | 500 (66.6)              | 328 (59.0)              |        |
| Hispanic                                      | 148 (19.7)              | 121 (21.8)              |        |
| Black                                         | 53 (7.1)                | 55 (9.9)                |        |
| Asian                                         | 38 (5.1)                | 41 (7.4)                |        |
| American Indian or Alaskan Native             | 3 (0.4)                 | 2 (0.4)                 |        |
| Other                                         | 9 (1.2)                 | 9 (1.6)                 |        |
| SBP (mean (SD))                               | 131 (14)                | 130 (13)                | 0.40   |
| DBP (mean (SD))                               | 76 (9)                  | 76 (9)                  | 0.66   |
| <b>Laboratory Test</b>                        |                         |                         |        |
| NT-proBNP (median [IQR])                      | 80.00 [35.00, 148.00]   | 78.00 [34.00, 142.00]   | 0.55   |
| hs-cTnt (median [IQR])                        | 10.00 [7.00, 14.00]     | 9.00 [7.00, 14.00]      | 0.004  |
| HbA1c (mean (SD))                             | 7.20 (1.25)             | 7.11 (0.95)             | 0.17   |
| Hgb (mean (SD))                               | 13.73 (1.52)            | 13.64 (1.43)            | 0.26   |
| eGFR (mean (SD))                              | 77.02 (18.62)           | 79.27 (17.50)           | 0.03   |
| <b>Echocardiogram</b>                         |                         |                         |        |
| LVEF (median [IQR])                           | 63.00 [60.00, 66.00]    | 61.00 [58.00, 64.00]    | <0.001 |
| GLS (median [IQR])                            | -18.90 [-20.40, -17.90] | -15.20 [-17.00, -14.20] | <0.001 |
| LAVI (median [IQR])                           | 22.10 [18.60, 26.17]    | 25.10 [20.00, 34.10]    | <0.001 |
| LVMI (median [IQR])                           | 69.00 [60.30, 80.00]    | 83.00 [67.00, 98.00]    | <0.001 |
| EE (median [IQR])                             | 8.80 [7.40, 10.40]      | 10.30 [8.40, 13.90]     | <0.001 |
| RVSP (median [IQR])                           | 22.60 [18.90, 26.00]    | 24.05 [19.52, 30.60]    | <0.001 |
| <b>CPET</b>                                   |                         |                         |        |
| PEAKVO2 (mean (SD))                           | 16.65 (5.08)            | 15.99 (4.77)            | 0.06   |
| Duration of CPET test, min, mean $\pm$ SD     | 1.16 (0.10)             | 1.16 (0.11)             | 0.84   |
| Peak respiratory exchange rate, mean $\pm$ SD | 16.65 (5.08)            | 15.99 (4.77)            | 0.06   |

**Appendix Table 3. Comparison of phenotype groups in the screened cohort.**

|                                       | Elevated Biomarkers of Heart disease | Systolic/LVH cluster | P (biomarkers vs systolic) | Diastolic + Overlap | P (biomarkers vs diastolic+overlap) | P (systolic vs diastolic+overlap) |
|---------------------------------------|--------------------------------------|----------------------|----------------------------|---------------------|-------------------------------------|-----------------------------------|
| n                                     | 907                                  | 301                  |                            | 255                 |                                     |                                   |
| AGE (mean (SD))                       | 67.25 (7.48)                         | 66.05 (7.36)         | 0.02                       | 68.91 (7.58)        | 0.03                                | <0.01                             |
| MALE (%)                              | 496 (54.7)                           | 178 (59.1)           | 0.20                       | 123 (48.2)          | 0.08                                | 0.01                              |
| Race (%)                              |                                      |                      | 0.02                       |                     | 0.31                                | 0.07                              |
| White                                 | 597 (65.8)                           | 175 (58.1)           |                            | 153 (60.0)          |                                     |                                   |
| Hispanic                              | 179 (19.7)                           | 58 (19.3)            |                            | 63 (24.7)           |                                     |                                   |
| Black                                 | 61 (6.7)                             | 39 (13.0)            |                            | 16 (6.3)            |                                     |                                   |
| Asian                                 | 58 (6.4)                             | 23 (7.6)             |                            | 18 (7.1)            |                                     |                                   |
| American Indian/Alaskan               | 3 (0.3)                              | 2 (0.7)              |                            | 0 (0.0)             |                                     |                                   |
| Other                                 | 9 (1.0)                              | 4 (1.3)              |                            | 5 (2.0)             |                                     |                                   |
| SBP (mean (SD))                       | 130.31 (13.26)                       | 127.81 (12.18)       | 0.02                       | 131.96 (14.21)      | 0.14                                | 0.01                              |
| DBP (mean (SD))                       | 76.08 (8.87)                         | 76.18 (8.63)         | 0.89                       | 75.62 (8.96)        | 0.53                                | 0.51                              |
| <b>Laboratory Tests</b>               |                                      |                      |                            |                     |                                     |                                   |
| NT-proBNP (median [IQR])              | 77 [44, 138]                         | 62 [29, 118]         | <.0001                     | 101 [47, 173]       | <.0001                              | <.0001                            |
| hs-cTnt (median [IQR])                | 9 [7, 13]                            | 9 [6, 13.25]         | 0.13                       | 10 [7, 14]          | 0.24                                | 0.04                              |
| HbA1c (% , mean (SD))                 | 7.22 (1.27)                          | 7.20 (1.01)          | 0.75                       | 7.01 (0.86)         | 0.01                                | 0.02                              |
| Hb (mean (SD))                        | 13.70 (1.50)                         | 13.76 (1.48)         | 0.51                       | 13.50 (1.37)        | 0.06                                | 0.03                              |
| eGFR (mean (SD))                      | 77.72 (18.38)                        | 80.71 (17.66)        | 0.01                       | 77.58 (17.19)       | 0.91                                | 0.04                              |
| <b>Echocardiogram</b>                 |                                      |                      |                            |                     |                                     |                                   |
| LVEF (median [IQR])                   | 63 [60, 66]                          | 60 [57, 63]          | <.0001                     | 63 [60, 66]         | 0.45                                | <.0001                            |
| GLS (median [IQR])                    | -18.8 [-20.2, -17.9]                 | -14.8 [-15.5, -13.9] | <.0001                     | -18.1 [-20, -15.5]  | <.0001                              | <.0001                            |
| LAVI (median [IQR])                   | 22 [19, 26]                          | 22 [18, 26]          | 0.26                       | 34 [25, 37]         | <.0001                              | <.0001                            |
| LVMI (median [IQR])                   | 68 [60, 79]                          | 74 [63, 91]          | <.01                       | 92 [74, 102]        | <.0001                              | <.0001                            |
| EE (median [IQR])                     | 8.7 [7.4, 10.3]                      | 8.9 [7.4, 10.2]      | 0.42                       | 14 [11.5, 15.7]     | <.0001                              | <.0001                            |
| RVSP (median [IQR])                   | 22.6 [18.8, 26]                      | 22.3 [18.2, 25.7]    | 0.40                       | 27.9 [21.9, 35]     | <.0001                              | <.0001                            |
| <b>CPET</b>                           |                                      |                      |                            |                     |                                     |                                   |
| PEAK VO2 (mean (SD))                  | 16.52 (4.91)                         | 16.35 (4.58)         | 0.66                       | 15.63 (4.93)        | 0.03                                | 0.12                              |
| Duration of CPET test, min, mean ± SD | 9.98 (2.79)                          | 10.08 (2.94)         | 0.66                       | 9.49 (2.89)         | 0.04                                | 0.04                              |
| Pk RER, mean ± SD                     | 1.16 (0.10)                          | 1.17 (0.11)          | 0.18                       | 1.15 (0.11)         | 0.32                                | 0.05                              |

**Appendix Table 4. Distribution of phenotypes in randomized (impaired exercise capacity) and screen-failure patients.** The randomized group had a greater proportion of patients with elevated biomarkers alone, and a smaller number of patients with a mixed phenotype (p<0.0001).

|                                   | <b>Elevated Biomarkers (907)</b> |                       | <b>Systolic/LVH (301)</b> |                       | <b>Diastolic (162)</b> |                        | <b>Overlap (93)</b>   |                         |
|-----------------------------------|----------------------------------|-----------------------|---------------------------|-----------------------|------------------------|------------------------|-----------------------|-------------------------|
| n                                 | Trial 347 (23.7%)                | S/Fail 560 (38.3%)    | Trial 169 (11.6%)         | S/Fail 132 (9.0%)     | Trial 86 (5.9%)        | S/Fail 76 (5.2%)       | Trial 67 (4.6%)       | S/Fail 26 (1.8%)        |
| Age (mean (SD))                   | 67.70 (7.01)                     | 66.97 (7.75)          | 66.88 (7.11)              | 64.99 (7.56)          | 66.27 (7.73)           | 71.01 (7.56)           | 69.06 (6.93)          | 70.88 (6.62)            |
| Male (%)                          | 168 (48.4)                       | 328 (58.6)            | 96 (56.8)                 | 82 (62.1)             | 52 (60.5)              | 38 (50.0)              | 21 (31.3)             | 12 (46.2)               |
| Race (%)                          |                                  |                       |                           |                       |                        |                        |                       |                         |
| Black or African American         | 19 (5.5)                         | 47 (8.4)              | 19 (11.2)                 | 21 (15.9)             | 6 (7.0)                | 4 (5.3)                | 4 (6.0)               | 3 (11.5)                |
| Other                             | 30 (8.6)                         | 146 (26.1)            | 19 (11.2)                 | 34 (25.8)             | 7 (8.1)                | 24 (31.5)              | 7 (10.4)              | 14 (53.9)               |
| White                             | 298 (85.9)                       | 367 (65.5)            | 131 (77.5)                | 77 (58.3)             | 73 (84.9)              | 48 (63.2)              | 56 (83.6)             | 9 (34.6)                |
| BMI (mean (SD))                   | 30 (4)                           | N/A                   | 30.33 (4.13)              | N/A                   | 31.03 (4.87)           | N/A                    | 31.88 (4.89)          | N/A                     |
| SBP (mean (SD))                   | 130 (12)                         | 131 (17)              | 127 (11)                  | 130 (17)              | 130(10)                | 137 (15)               | 128(12)               | 148 (28)                |
| <b>Medical History</b>            |                                  |                       |                           |                       |                        |                        |                       |                         |
| Duration of T2DM, yrs (mean (SD)) | 12.92 (10.13)                    | N/A                   | 14.91 (8.08)              | N/A                   | 15.38 (10.82)          | N/A                    | 16.20 (10.30)         | N/A                     |
| Hypertension(%)                   | 259 (74.6)                       | N/A                   | 129 (76.3)                | N/A                   | 67 (77.9)              | N/A                    | 54 (80.6)             | N/A                     |
| Dyslipidemia (%)                  | 52 (15.0)                        | N/A                   | 30 (17.8)                 | N/A                   | 17 (19.8)              | N/A                    | 13 (19.4)             | N/A                     |
| <b>Medications</b>                |                                  |                       |                           |                       |                        |                        |                       |                         |
| ACEi-ARBs (%)                     | 256 (73.8)                       | N/A                   | 120 (71.0)                | N/A                   | 73 (84.9)              | N/A                    | 53 (79.1)             | N/A                     |
| B-Blockers (%)                    | 90 (25.9)                        | N/A                   | 30 (17.8)                 | N/A                   | 23 (26.7)              | N/A                    | 17 (25.4)             | N/A                     |
| MRA (%)                           | 9 (2.6)                          | N/A                   | 4 (2.4)                   | N/A                   | 2 (2.3)                | N/A                    | 4 (6.0)               | N/A                     |
| Hydrochlorothiazide (%)           | 60 (17.3)                        | N/A                   | 32 (18.9)                 | N/A                   | 25 (29.1)              | N/A                    | 11 (16.4)             | N/A                     |
| SGLT2 (%)                         | 110 (31.7)                       | N/A                   | 54 (32.0)                 | N/A                   | 26 (30.2)              | N/A                    | 20 (29.9)             | N/A                     |
| GLP1 (%)                          | 78 (22.5)                        | N/A                   | 57 (33.7)                 | N/A                   | 20 (23.3)              | N/A                    | 14 (20.9)             | N/A                     |
| Statin(%)                         | 271 (78.1)                       | N/A                   | 148 (87.6)                | N/A                   | 66 (76.7)              | N/A                    | 50 (74.6)             | N/A                     |
| Metformin(%)                      | 266 (76.7)                       | N/A                   | 129 (76.3)                | N/A                   | 60 (69.8)              | N/A                    | 45 (67.2)             | N/A                     |
| Sulfonylureas (%)                 | 88 (25.4)                        | N/A                   | 30 (17.8)                 | N/A                   | 18 (20.9)              | N/A                    | 16 (23.9)             | N/A                     |
| Insulin (%)                       | 78 (22.5)                        | N/A                   | 49 (29.0)                 | N/A                   | 31 (36.0)              | N/A                    | 18 (26.9)             | N/A                     |
| DDP4 (%)                          | 40 (11.5)                        | N/A                   | 22 (13.0)                 | N/A                   | 5 (5.8)                | N/A                    | 12 (17.9)             | N/A                     |
| <b>Laboratory Test</b>            |                                  |                       |                           |                       |                        |                        |                       |                         |
| NT-proBNP (median [IQR])          | 77.00 [46.00, 141.50]            | 77.00 [42.00, 132.00] | 61.00 [28.00, 117.50]     | 64.00 [29.00, 122.25] | 70.00 [37.00, 125.25]  | 107.00 [59.50, 189.00] | 98.00 [42.50, 161.00] | 184.00 [119.25, 358.50] |
| hs-cTnt (median [IQR])            | 9.00 [6.00, 12.00]               | 10.00 [7.00, 14.00]   | 8.00 [6.00, 12.00]        | 9.00 [6.00, 15.00]    | 11.00 [8.00, 13.75]    | 11.50 [8.00, 16.00]    | 8.00 [6.00, 10.00]    | 13.00 [8.25, 19.75]     |
| HbA1c (% , mean (SD))             | 6.95 (0.81)                      | 7.39 (1.47)           | 7.02 (0.81)               | 7.43 (1.19)           | 7.11 (0.81)            | 6.97 (0.85)            | 6.84 (0.57)           | 7.19 (1.46)             |
| Hgb (mean (SD))                   | 13.71 (1.37)                     | 13.69 (1.57)          | 13.70 (1.49)              | 13.85 (1.47)          | 13.68 (1.34)           | 13.55 (1.34)           | 13.29 (1.32)          | 13.26 (1.61)            |
| eGFR (mean (SD))                  | 79.67 (16.02)                    | 76.51 (19.63)         | 81.85 (16.16)             | 79.26 (19.39)         | 81.10 (16.83)          | 76.46 (15.93)          | 77.63 (15.82)         | 69.04 (22.27)           |

**Appendix Table 5.** Evolution of peak VO2 and functional status over 15 month follow-up in participants treated with placebo.

| <b>Phenogroup (n)</b>                     | <b>Elevated Biomarkers<br/>N = 117</b> | <b>Systolic/ LVH<br/>N = 54</b> | <b>p</b> | <b>Diastolic<br/>N = 28</b> | <b>P</b> | <b>Overlap<br/>N = 24</b> | <b>P</b>     |
|-------------------------------------------|----------------------------------------|---------------------------------|----------|-----------------------------|----------|---------------------------|--------------|
| <b>Primary Endpoint</b>                   |                                        |                                 |          |                             |          |                           |              |
| Peak VO2, Month 15, mL/Kg/min, mean ± SD  | 15.50 (3.92)                           | 15.40 (4.48)                    | 0.90     | 15.80 (4.28)                | 0.75     | 12.32 (3.90)              | <b>0.001</b> |
| Peak VO2, Change, mL/Kg/min, mean ± SD    | -0.43 (2.25)                           | -0.43 (2.39)                    | 0.98     | 0.14 (2.24)                 | 0.31     | -0.90 (1.73)              | 0.37         |
| <b>PASE Score, Month 15</b>               |                                        |                                 |          |                             |          |                           |              |
| PASE score, Month 15, mean ± SD           | 150.35 (81.79)                         | 163.48 (116.30)                 | 0.43     | 176.47 (81.48)              | 0.19     | 135.81 (77.56)            | 0.47         |
| PASE score, change, mean ± SD             | -8.11 (86.64)                          | -7.38 (97.97)                   | 0.97     | 19.98 (73.50)               | 0.19     | 11.99 (73.63)             | 0.36         |
| <b>KCCQ Score, Month 15</b>               |                                        |                                 |          |                             |          |                           |              |
| KCCQ physical limitation score, mean ± SD | 87.43 (17.95)                          | 84.01 (21.06)                   | 0.30     | 96.03 (7.62)                | 0.03     | 78.92 (22.71)             | 0.07         |
| KCCQ symptom stability score, mean ± SD   | 51.49 (15.34)                          | 54.41 (11.94)                   | 0.24     | 52.38 (10.91)               | 0.80     | 51.25 (9.85)              | 0.95         |
| KCCQ symptom burden score, mean ± SD      | 89.32 (17.24)                          | 88.89 (15.43)                   | 0.88     | 96.03 (6.78)                | 0.08     | 85.83 (19.52)             | 0.42         |
| KCCQ self-efficacy score, mean ± SD       | 83.75 (25.34)                          | 78.92 (28.12)                   | 0.29     | 88.10 (25.15)               | 0.48     | 91.88 (13.00)             | 0.17         |
| KCCQ quality of life score, mean ± SD     | 87.54 (19.28)                          | 83.82 (19.47)                   | 0.27     | 93.65 (9.83)                | 0.16     | 84.17 (23.55)             | 0.49         |
| KCCQ social limitation score, mean ± SD   | 90.77 (18.43)                          | 86.48 (20.70)                   | 0.24     | 96.98 (6.32)                | 0.14     | 84.72 (25.83)             | 0.24         |
| KCCQ total symptom score, mean ± SD       | 88.72 (17.24)                          | 89.26 (14.14)                   | 0.85     | 96.03 (5.63)                | 0.06     | 84.53 (18.78)             | 0.33         |
| KCCQ clinical summary score, mean ± SD    | 88.07 (16.87)                          | 86.63 (16.06)                   | 0.62     | 96.03 (5.26)                | 0.04     | 81.72 (18.86)             | 0.13         |
| KCCQ overall summary score, mean ± SD     | 88.79 (16.18)                          | 86.18 (16.18)                   | 0.35     | 95.68 (5.26)                | 0.06     | 83.17 (20.22)             | 0.18         |
| <b>KCCQ Score, Change month 0- 15</b>     |                                        |                                 |          |                             |          |                           |              |
| KCCQ physical limitation score, mean ± SD | -0.73 (11.54)                          | -6.42 (19.36)                   | 0.03     | 0.79 (11.07)                | 0.58     | -4.68 (11.80)             | 0.19         |
| KCCQ symptom stability score, mean ± SD   | -2.00 (16.55)                          | 2.45 (13.47)                    | 0.10     | -1.19 (16.73)               | 0.84     | -2.50 (16.02)             | 0.90         |
| KCCQ symptom burden score, mean ± SD      | -1.86 (12.73)                          | -4.08 (14.47)                   | 0.33     | -1.19 (7.11)                | 0.82     | -3.75 (11.30)             | 0.54         |
| KCCQ self-efficacy score, mean ± SD       | -2.27 (24.83)                          | 1.25 (30.54)                    | 0.45     | 1.79 (14.94)                | 0.47     | -3.12 (14.55)             | 0.88         |
| KCCQ quality of life score, mean ± SD     | 0.58 (16.04)                           | 0.49 (21.24)                    | 0.98     | -0.99 (11.63)               | 0.67     | -2.92 (19.55)             | 0.39         |
| KCCQ social limitation score, mean ± SD   | -0.73 (13.91)                          | -3.42 (16.13)                   | 0.36     | 0.81 (10.03)                | 0.66     | -3.85 (19.35)             | 0.49         |
| KCCQ total symptom score, mean ± SD       | -2.21 (11.89)                          | -3.43 (13.38)                   | 0.57     | -0.69 (5.67)                | 0.57     | -5.31 (11.47)             | 0.29         |
| KCCQ clinical summary score, mean ± SD    | -1.47 (9.19)                           | -4.61 (15.35)                   | 0.12     | 0.05 (7.09)                 | 0.48     | -5.70 (11.94)             | 0.08         |
| KCCQ overall summary score, mean ± SD     | -0.59 (8.89)                           | -3.24 (15.28)                   | 0.18     | -0.12 (5.83)                | 0.82     | -4.29 (13.08)             | 0.12         |
